# Supplementary material for: Modeling Sialidosis with Neural Precursor Cells Derived from Patient-Derived Induced Pluripotent Stem Cells
Source: MDPI journal article supplement (doi:10.3390/ijms22094386), 2021-04-22
Supplement: s1 [file s1]

# Supplementary Materials

## Supplementary Figures

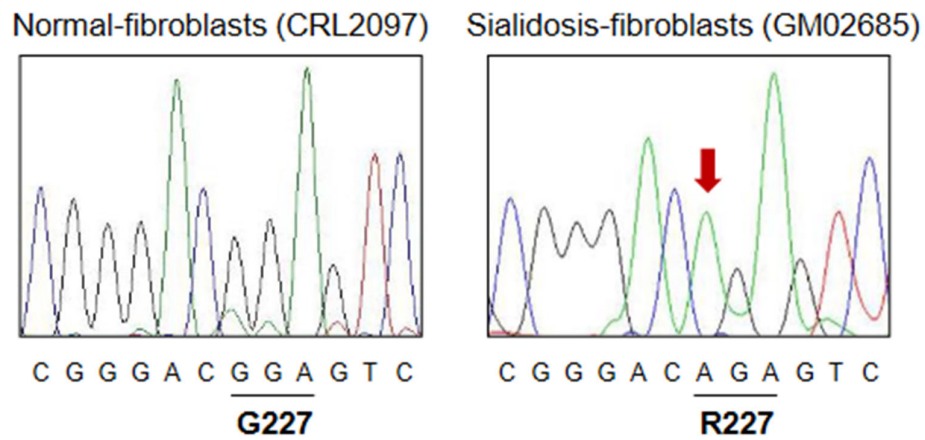

**Supplementary Figure S1.** Confirmation of DNA sequences of the *NEU1* gene in normal and sialidosis patient fibroblasts carrying the G227R mutation in *NEU1*.

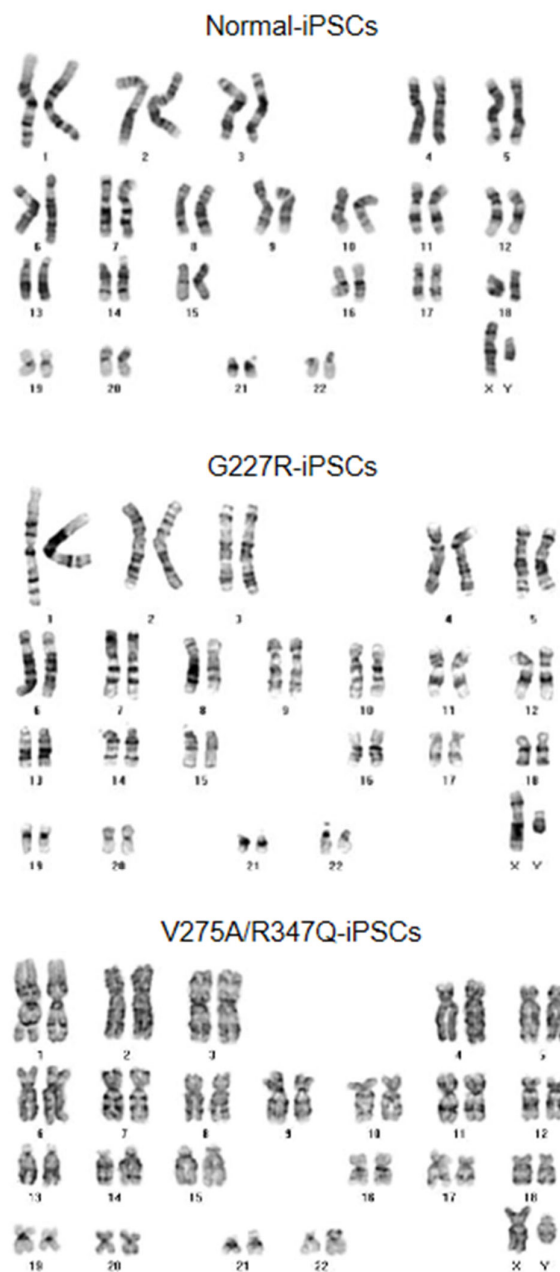

**Supplementary Figure S2.** Representative G-banding karyotype images of normal- and sialidosis-iPSCs (G227R- and V275A/R347Q-iPSCs) at passages 20–25.

**Table 1.** STR profiles of normal- and sialidosis-iPSCs and their parental cells.

[illegible]

**Table 2.** List of antibodies used in this study.

| Antibodies           | Target Protein           | Company (Cat. No.)                     | Dilution  |
|----------------------|--------------------------|----------------------------------------|-----------|
| Primary antibodies   | $\alpha$ -SMA            | Sigma (A5228)                          | 1 : 200   |
|                      | DESMIN                   | Chemicon (AB907)                       | 1 : 50    |
|                      | FOXA2                    | Millipore (07-633)                     | 1 : 100   |
|                      | GFAP                     | Abcam (ab134436)                       | 1 : 1000  |
|                      | LAMP1                    | Abcam (ab25630)                        | 1 : 1000  |
|                      | MAP2                     | Sigma (M1406)                          | 1 : 1000  |
|                      | NANOG                    | R&D (AF1997)                           | 1 : 40    |
|                      | NESTIN                   | Millipore (MAB5326)                    | 1 : 100   |
|                      | NEU1                     | Rockland Immunochemicals (100-401-396) | 1 : 100   |
|                      | O4                       | R&D (MAB1326)                          | 1 : 100   |
|                      | Oct3/4                   | Santa Cruz (sc-9081)                   | 1 : 100   |
|                      | OLIG-2                   | Abcam (AB9610)                         | 1 : 500   |
|                      | PPCA                     | Abcam (ab184553)                       | 1 : 10000 |
|                      | SOX17                    | R&D (MAB1924)                          | 1 : 50    |
|                      | SSEA-3                   | R&D (MAB1434)                          | 1 : 30    |
|                      | SSEA-4                   | Millipore (MAB1435)                    | 1 : 30    |
|                      | TRA-1-60                 | Millipore (MAB4360)                    | 1 : 100   |
|                      | TRA-1-81                 | Millipore (MAB4381)                    | 1 : 100   |
|                      | TUJ1                     | Biolegend (802001)                     | 1 : 500   |
| Secondary antibodies | Chicken anti-rabbit IgG  | Invitrogen (A21442)                    | 1 : 200   |
|                      | Chicken anti-goat IgG    | Invitrogen (A21467)                    | 1 : 200   |
|                      | Goat anti-mouse IgM      | Invitrogen (A21044)                    | 1 : 200   |
|                      | FITC mouse anti-rat IgM  | BD Pharmingen (553887)                 | 1 : 200   |
|                      | Donkey anti-mouse IgG    | Invitrogen (A21202)                    | 1 : 200   |
|                      | FITC rat anti-mouse IgM  | BD Pharmingen (553437)                 | 1 : 200   |
|                      | Goat anti-rabbit IgG-HRP | Santa Cruz (SC-2004)                   | 1 : 10000 |
|                      | Goat anti-mouse IgG -HRP | Ab Frontier (LF-SA8001)                | 1 : 10000 |
